# Supplementary material for: Technology-Supported Guidance Models Stimulating the Development of Critical Thinking in Clinical Practice: Mixed Methods Systematic Review
Source: PubMed Central journal article supplement (PMC9214617; doi:10.2196/37380), 2022-06-07
Supplement: nursing_v5i1e37380_app3.pdf [file nursing_v5i1e37380_app3.pdf]

Multimedia Appendix 3. Example of the MEDLINE search strategy applied to all databases in the search strategy

Database(s): Ovid MEDLINE(R) and Epub Ahead of Print, In-Process & Other Non-Indexed Citations and Daily 1946 to October 12, 2020

Search Strategy:

| #  | Searches                                                                                                                                                                  | Results |
|----|---------------------------------------------------------------------------------------------------------------------------------------------------------------------------|---------|
| 1  | ((nurse or nursing or nurses) adj5 (student* or education or undergrad* or under-grad* or bachelor* or baccalaur* or preregistration or preregistration)).tw,kf.          | 54371   |
| 2  | education, nursing/                                                                                                                                                       | 32842   |
| 3  | education, nursing, baccalaureate/                                                                                                                                        | 18254   |
| 4  | Students, Nursing/                                                                                                                                                        | 24711   |
| 5  | Nursing Education Research/                                                                                                                                               | 8902    |
| 6  | 1 or 2 or 3 or 4 or 5                                                                                                                                                     | 89716   |
| 7  | (student* adj3 (practic* or practis* or placement* supervis* or clerkship* or apprenticeship*)).tw,kf.                                                                    | 8614    |
| 8  | (clinic* adj3 (practic* or practis* or placement* or supervis* clerkship* or apprenticeship* or setting* or pedagog* or teach* or learn* or educat* or training*)).tw,kf. | 357247  |
| 9  | coach*.tw,kf.                                                                                                                                                             | 16501   |
| 10 | mentor*.tw,kf.                                                                                                                                                            | 17740   |
| 11 | preceptor*.tw,kf.                                                                                                                                                         | 4387    |
| 12 | clinical clerkship/                                                                                                                                                       | 5142    |
| 13 | mentoring/                                                                                                                                                                | 1869    |
| 14 | Mentors/                                                                                                                                                                  | 10901   |
| 15 | Preceptorship/                                                                                                                                                            | 5140    |
| 16 | 7 or 8 or 9 or 10 or 11 or 12 or 13 or 14                                                                                                                                 | 404474  |
| 17 | Telecommunications/                                                                                                                                                       | 4837    |
| 18 | Telephone/                                                                                                                                                                | 11885   |
| 19 | Cell phone/                                                                                                                                                               | 8637    |
| 20 | Videoconferencing/                                                                                                                                                        | 1626    |
| 21 | Webcasts as topic/                                                                                                                                                        | 348     |
| 22 | Wireless technology/                                                                                                                                                      | 3627    |
| 23 | Text messaging/                                                                                                                                                           | 3029    |
| 24 | Technology/                                                                                                                                                               | 9672    |
| 25 | Educational technology/                                                                                                                                                   | 1529    |
| 26 | Mobile Applications/                                                                                                                                                      | 6371    |
| 27 | Computers, handheld/                                                                                                                                                      | 3645    |
| 28 | Smartphone/                                                                                                                                                               | 4750    |
| 29 | Internet/                                                                                                                                                                 | 73607   |
| 30 | (mobile* or phone* or phoning or telephon* or cellphon* or smartphon* or iphon* or android*).tw,kf.                                                                       | 209604  |
| 31 | electronic*.tw,kf.                                                                                                                                                        | 298097  |
| 32 | digital*.tw,kf.                                                                                                                                                           | 158169  |
| 33 | video*.tw,kf.                                                                                                                                                             | 138815  |
| 34 | web*.tw,kf.                                                                                                                                                               | 176909  |
| 35 | internet.tw,kf.                                                                                                                                                           | 59156   |
| 36 | online.tw,kf.                                                                                                                                                             | 133179  |

|    |                                                                                                                                                                                                                            |         |
|----|----------------------------------------------------------------------------------------------------------------------------------------------------------------------------------------------------------------------------|---------|
| 37 | app*.tw,kf.                                                                                                                                                                                                                | 39987   |
| 38 | app-base*.tw,kf.                                                                                                                                                                                                           | 717     |
| 39 | telecommunicat*.tw,kf.                                                                                                                                                                                                     | 4739    |
| 40 | tele-communicat*.tw,kf.                                                                                                                                                                                                    | 14      |
| 41 | tablet*.tw,kf.                                                                                                                                                                                                             | 57355   |
| 42 | ((portable or handheld or hand-held) adj1 computer*).tw,kf.                                                                                                                                                                | 1008    |
| 43 | etutor*.tw,kf.                                                                                                                                                                                                             | 2       |
| 44 | e-tutor*.tw,kf.                                                                                                                                                                                                            | 10      |
| 45 | ((short or text or instant) adj1 messag*).tw,kf.                                                                                                                                                                           | 6067    |
| 46 | texting.tw,kf.                                                                                                                                                                                                             | 1038    |
| 47 | sms.tw,kf.                                                                                                                                                                                                                 | 6690    |
| 48 | eportfolio*.tw,kf.                                                                                                                                                                                                         | 61      |
| 49 | e-portfolio*.tw,kf.                                                                                                                                                                                                        | 141     |
| 50 | (wireless adj2 communicat*).tw,kf.                                                                                                                                                                                         | 2003    |
| 51 | pda.tw,kf.                                                                                                                                                                                                                 | 13037   |
| 52 | personal digital assistant*.tw,kf.                                                                                                                                                                                         | 1041    |
| 53 | "virtual session*".tw,kf.                                                                                                                                                                                                  | 17      |
| 54 | 17 or 18 or 19 or 20 or 21 or 22 or 23 or 24 or 25 or 26 or 27 or 28 or 29 or 30 or 31 or 32 or 33 or 34 or 35 or 36 or 37 or 38 or 39 or 40 or 41 or 42 or 43 or 44 or 45 or 46 or 47 or 48 or 49 or 50 or 51 or 52 or 53 | 1193131 |
| 55 | 6 and 16 and 54                                                                                                                                                                                                            | 1763    |
| 56 | limit 55 to yr="2010 -Current"                                                                                                                                                                                             | 1368    |
| 57 | limit 56 to (comment or editorial or letter)                                                                                                                                                                               | 6       |
| 58 | 56 not 57                                                                                                                                                                                                                  | 1362    |
